# Supplementary material for: Many lives of cobalt within electrochemical systems: from waste batteries to efficient hydrogen evolution reaction electrocatalyst
Source: Springer Nature journal article supplement (doi:10.1007/s40243-025-00312-y), 2025-06-03
Supplement: MOESM1 [file 40243_2025_312_MOESM1_ESM.pdf]

## Supporting Information

### Many Lives of Cobalt within Electrochemical Systems: from Waste Batteries to Efficient Hydrogen Evolution Reaction Electrocatalyst

<sup>1</sup>Lorenzo Mirizzi<sup>+</sup>, <sup>1</sup>Eleonora Carena<sup>+</sup>, <sup>1</sup>Carlo Santoro, <sup>2,3</sup>Valerio C.A. Ficca, <sup>2</sup>Ernesto Placidi, <sup>3</sup>Enrico Berretti, <sup>4</sup>Alessandro Lavacchi, <sup>1</sup>Chiara Ferrara\*, <sup>1</sup>Mohsin Muhyuddin\*\*

<sup>1</sup> Department of Materials Science University of Milano-Bicocca, U5, Via Roberto Cozzi 55, 20125, Milan (MI), Italy

<sup>2</sup> Department of Physics, Sapienza University of Rome, Piazzale Aldo Moro 2, 00185 Roma, Italy

<sup>3</sup> TERIN Department, Division of Technologies and Vectors for Decarbonization, ENEA Casaccia Research Center, Via Anguillarese 301, 00123 Santa Maria di Galeria, Rome, Italy

<sup>4</sup> Istituto di Chimica Dei Composti OrganoMetallici (ICCOM), Consiglio Nazionale Delle Ricerche (CNR), Via Madonna Del Piano 10, 50019 Sesto Fiorentino, Firenze (Italy)

+ contributed equally

Corresponding Authors:

\*Chiara Ferrara: [chiara.ferrara@unimib.it](mailto:chiara.ferrara@unimib.it)

\*\*Mohsin Muhyuddin: [mohsin.muhyuddin@unimib.it](mailto:mohsin.muhyuddin@unimib.it)

Table S1. Elemental composition

|                  | at. % |      |     |      |     |      |      |
|------------------|-------|------|-----|------|-----|------|------|
|                  | O1s   | Co2p | C1s | F1s  | P2p | Li1s | Al2s |
| <b>c-LCO</b>     | 55.1  | 16.9 | 0.4 | 0.0  | 0.0 | 27.7 | 0.0  |
| <b>p-LCO-400</b> | 55.8  | 15.0 | 0.2 | 0.0  | 0.0 | 28.9 | 0.0  |
| <b>p-LCO-550</b> | 87.3  | 11.5 | 1.2 | 0.0  | 0.0 | 0.0  | 0.0  |
| <b>p-LCO-700</b> | 78.5  | 19.8 | 1.7 | 0.0  | 0.0 | 0.0  | 0.0  |
| <b>w-LCO</b>     | 50.6  | 3.7  | 2.5 | 34.0 | 4.9 | 0.0  | 4.3  |
| <b>r-LCO</b>     | 77.9  | 20.3 | 1.8 | 0.0  | 0.0 | 0.0  | 0.0  |

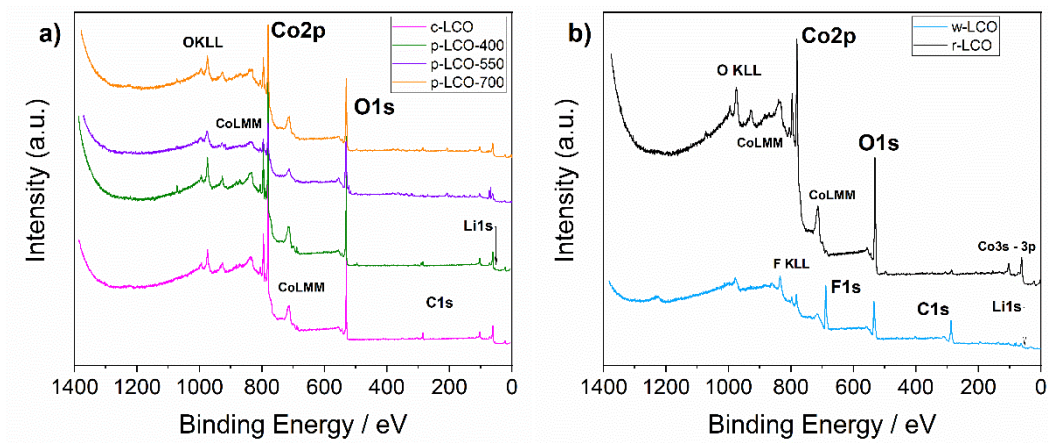

**Figure S1.** Survey scans of LCO samples showing all the elements identified. a) c-LCO and p-LCO-T, b) w-LCO and r-LCO-based samples.

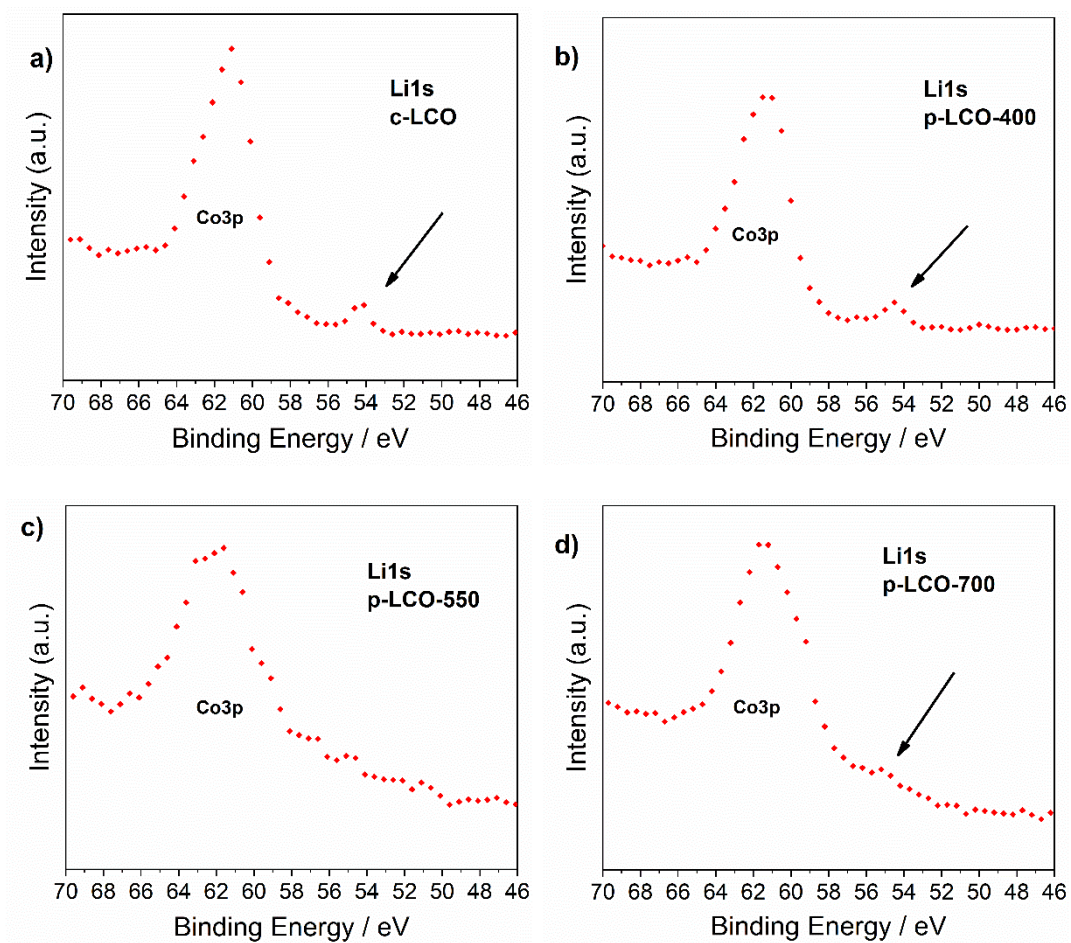

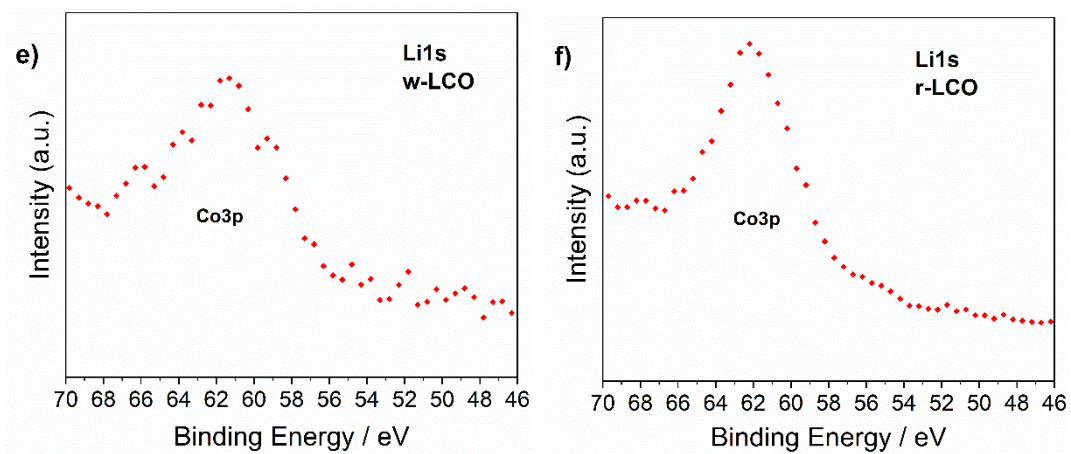

**Figure S2.** Li1s signal of LCO samples (black arrow). a) c-LCO, b) p-LCO-400, c) p-LCO-550, d) p-LCO-700, e) w-LCO, f) r-LCO. The Co3p peak is also reported and complicates the evaluation of Li1s.

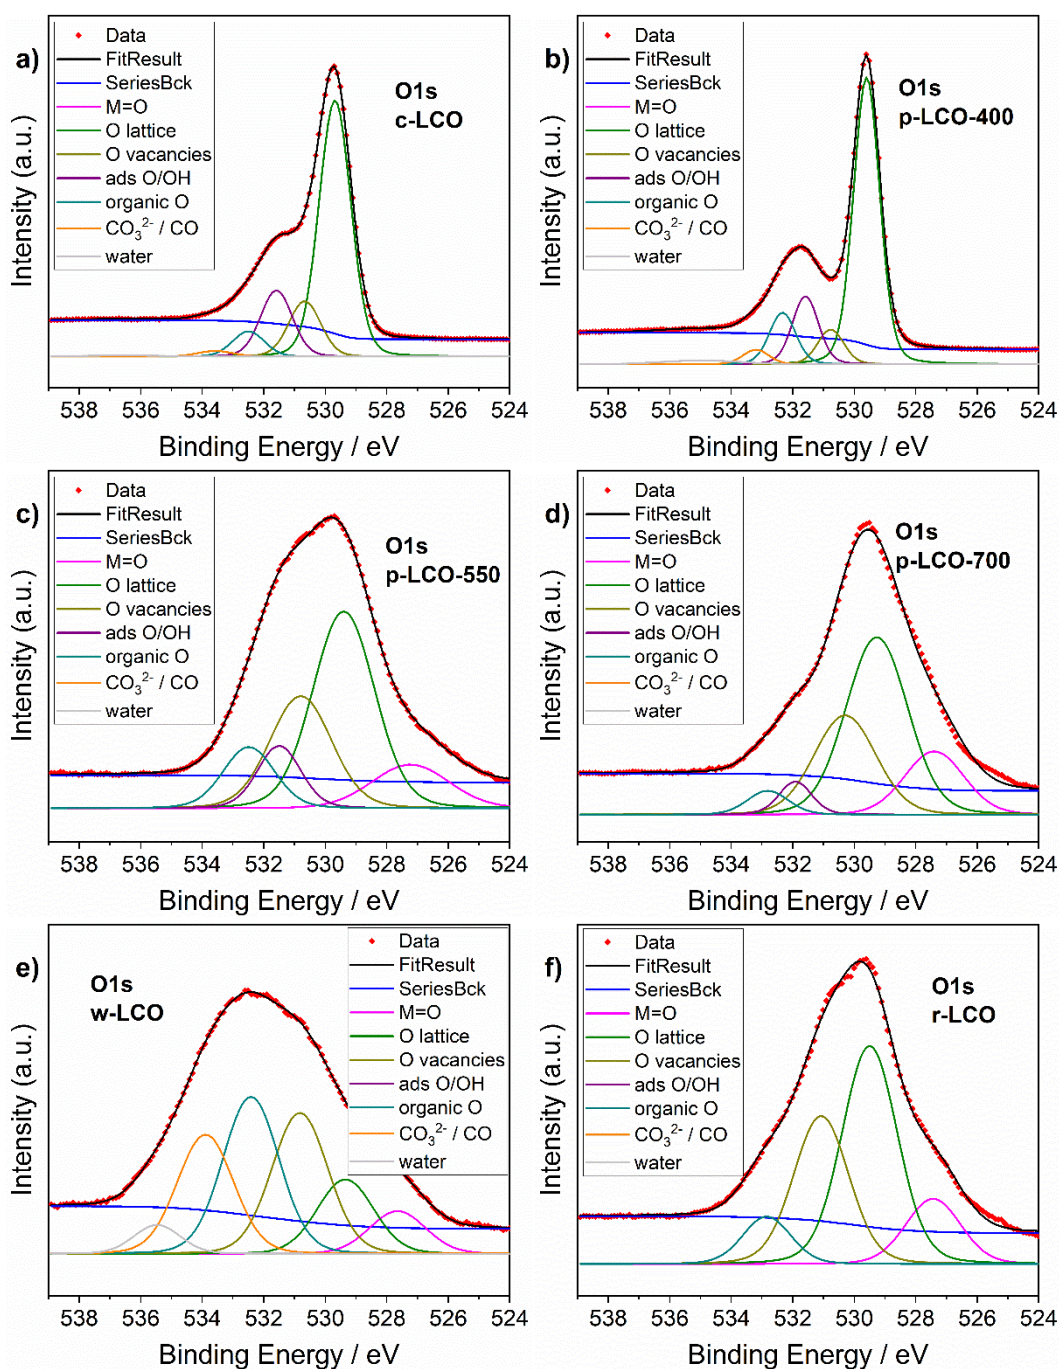

**Figure S3.** O1s spectra of LCO samples. a) C-LCO, b) P-LCO-400, c) P-LCO-550, d) P-LCO-700, e) W-LCO, f) r-LCO.

Fitting criteria for Co2p and O1s core levels.

The Co2p spectra were deconvoluted into two main components and two characteristic satellites. The Co(III) at 779 - 780 eV and the corresponding satellite at 790 eV, the Co(II) at 780 – 781 eV with its satellite at 785-786 eV. [1–3] An additional peak was also included between 782 – 783 eV according to the literature of  $\text{Co}_3\text{O}_4$  and ascribed to multiple transitions. [4] The peak was required due to the similarities in terms of the spectra' shape of the samples with that mixed Co compound. C 1s core levels were acquired as well and fitted according to previous studies (data not shown). [5, 6] Within the O1s fitting, seven different components were identified and associated with O double bonded to metal (M=O, < 528 eV), [7] O in the crystalline lattice ( O lattice, 528.5 – 529.5 eV), [8] O defects



|             |  |  |  |  |  |  |  |  |       |           |  |  |
|-------------|--|--|--|--|--|--|--|--|-------|-----------|--|--|
|             |  |  |  |  |  |  |  |  |       |           |  |  |
| <b>F1</b>   |  |  |  |  |  |  |  |  | 687.4 | 82.<br>2  |  |  |
| <b>F2</b>   |  |  |  |  |  |  |  |  | 684.8 | 17.<br>8  |  |  |
|             |  |  |  |  |  |  |  |  |       |           |  |  |
| <b>P1</b>   |  |  |  |  |  |  |  |  | 132.9 | 33.<br>4  |  |  |
| <b>P2</b>   |  |  |  |  |  |  |  |  | 136.1 | 66.<br>6  |  |  |
|             |  |  |  |  |  |  |  |  |       |           |  |  |
| <b>Li1s</b> |  |  |  |  |  |  |  |  |       |           |  |  |
|             |  |  |  |  |  |  |  |  |       |           |  |  |
| <b>Al</b>   |  |  |  |  |  |  |  |  | 120.9 | 100<br>.0 |  |  |

The electrochemical analysis was commenced with the acquisition of cyclic voltammograms (CVs) in the working electrolyte of 1M KOH and the achieved trends have been displayed in [Figure S4](#). When the glassy carbon electrode was deposited with the electrocatalytic samples i.e. p-LCO-700 and r-LCO in their pristine form several redox peaks appeared in the positive window whose intensities were further enhanced when the sample r-LCO was mixed with KJB and Vulcan XC72R in 20/80 ratio and the corresponding samples i.e K-r-LCO and V-r-LCO inferred to be relatively more redox active. However, the electrochemical redox events above 0 V vs RHE remain beyond the scope of the presented study. Nevertheless, it's important to highlight that beyond such redox events (particularly below ca. -0.2 V vs RHE) the HER initiated. Comparatively earlier onset of HER of r-LCO was further improved with the addition of carbons i.e. KJB and Vulcan XC72R, enhancing the HER rates as indicated by the sharper peaks.

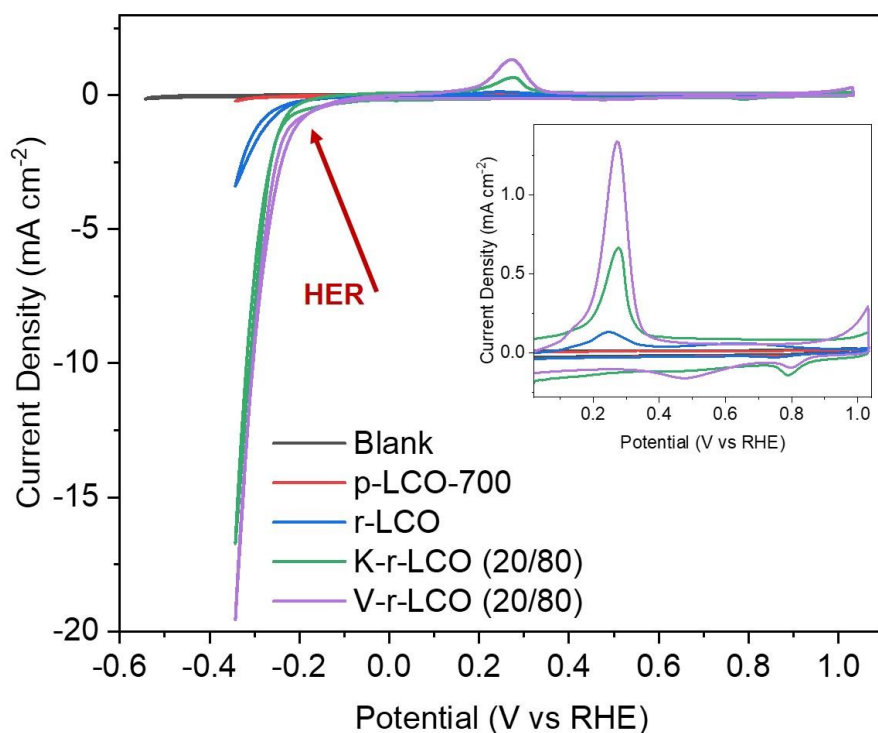

**Figure S4:** Cyclic Voltammetry (CV) run without any sample on the electrode surface (Blank) and with the deposited ( $0.6 \text{ mg cm}^{-2}$ ) on the glassy carbon electrode in the  $\text{N}_2$ -saturated  $1\text{M KOH}$  under stationary conditions at  $5\text{mV s}^{-1}$  scan rate. CV was performed on the p-LCO-700 and r-LCO in pure form while the sample r-LCO with the 80 wt.% addition of KJB (K-r-LCO) and Vulcan XC72R (V-r-LCO) was analyzed separately.

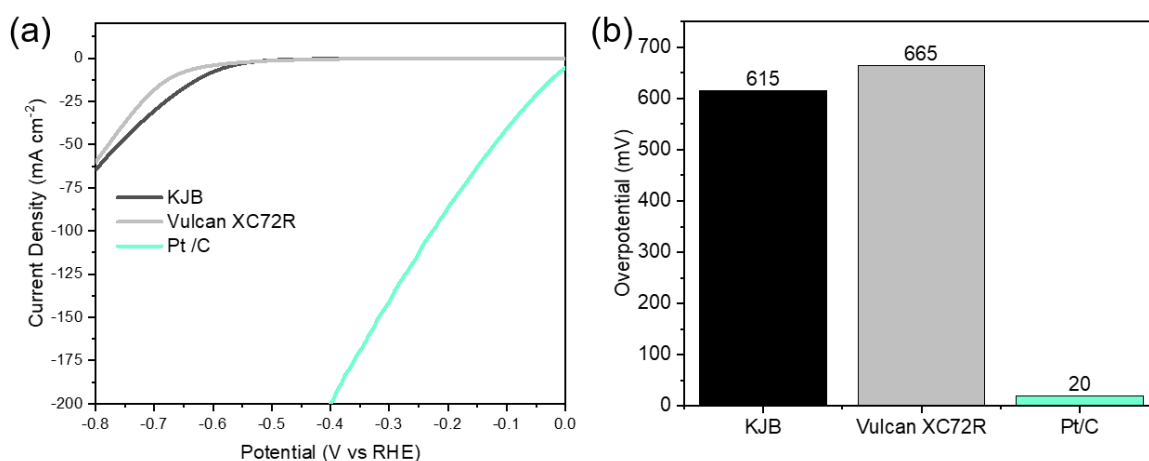

**Figure S5:** HER activities of pure carbon black i.e. KJB and VulcanXC72R, and benchmark Pt/C (containing 40 wt.% Pt). LSVs at  $5\text{mV s}^{-1}$  (a) and overpotential estimated at  $-10 \text{ mA cm}^{-2}$  (b) for the  $0.6 \text{ mg cm}^{-2}$  electrocatalyst loadings on RDE rotating at 1600 rpm in  $\text{N}_2$ -saturated  $1\text{M KOH}$ .

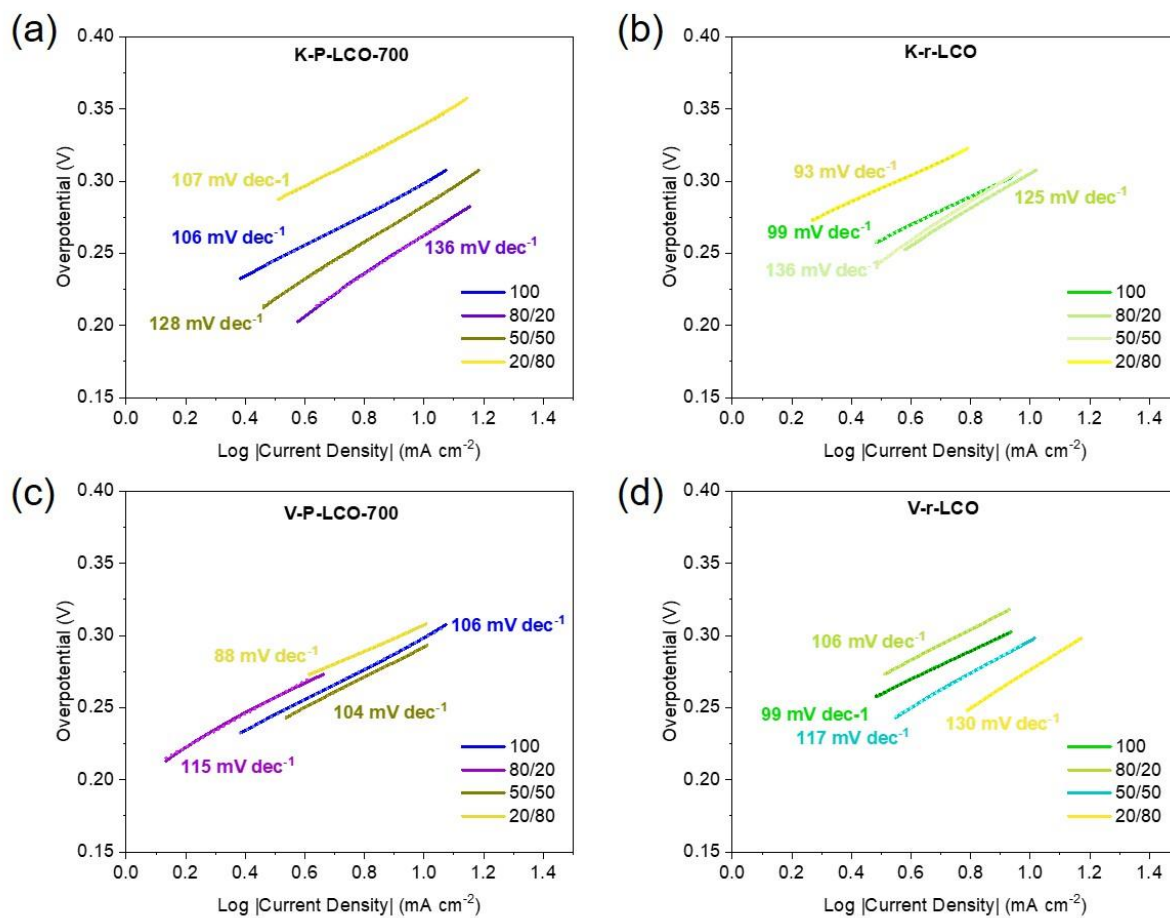

Figure S6: Tafel plots obtained for K-p-LCO-700 (a), K-r-LCO (b), V-p-LCO-700 (c) and V-r-LCO (d) with different ratios of active material and carbon back (0 to 80%).

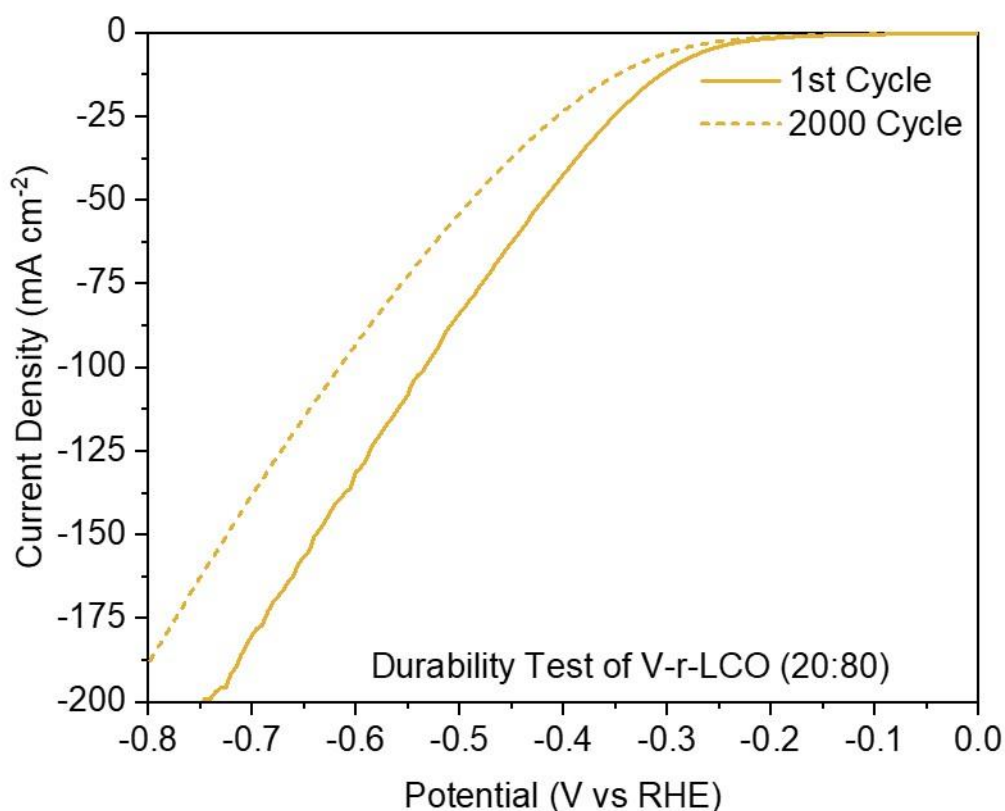

**Figure S7:** Accelerated Stability Test over the sample V-r-LCO (20/80) acquired by applying 2000 CV cycles under the stationary conditions with the electrocatalyst loading of  $0.6 \text{ mg cm}^{-2}$  loading in  $\text{N}_2$ -saturated 1M KOH. The initial and final CV were recorded at the scan rate of  $5 \text{ mV s}^{-1}$  while in between the sample was cycled at a  $50 \text{ mV s}^{-1}$  scan rate.

**Table S2:** Comparison of the performance with other Co-based electrocatalysts for HER

| Sample                                     | Overpotential at $-10 \text{ mA cm}^{-2}$ (mV) | Tafel Slope ( $\text{mV dec}^{-1}$ ) | Electrolyte                   | Reference |
|--------------------------------------------|------------------------------------------------|--------------------------------------|-------------------------------|-----------|
| K-p-LCO-700 (80/20)                        | 262                                            | 136                                  | 1M KOH                        | This Work |
| V-r-LCO (20/80)                            | 273                                            | 130                                  | 1M KOH                        | This Work |
| $\text{CoS}_2/\text{MoS}_2/\text{NC}$ -25% | 215                                            | 80                                   | 0.5 M $\text{H}_2\text{SO}_4$ | [13]      |
| Co-NCNTs-10                                | 204                                            |                                      | 1 M KOH                       | [14]      |
| CoP@BCN-1                                  | 215                                            | 52                                   | 1M KOH                        | [15]      |
| Co/N-C-700                                 | 84                                             | 128                                  | 1M KOH                        | [16]      |
| Fe-Co-O/Co@NC-mNS/NF                       | 112                                            | 96                                   | 1M KOH                        | [17]      |
| Cu@Cu-Ni-Co                                | 125                                            | 79.1                                 | 1M NaOH                       | [18]      |
| Fe- $\text{Co}_3\text{O}_4$ /NF            | 196                                            | 109                                  | 1M KOH                        | [19]      |
| Waste LCOd                                 | 277                                            | -                                    | 1M KOH                        | [20]      |
| Co/ $\text{Co}_3\text{O}_4$                | 90                                             | 44                                   | 1M KOH                        | [21]      |
| CoN-Gr-2                                   | 128                                            | 67.35                                | 1M KOH                        | [22]      |

## References

1. da Silva Freitas, W., Mecheri, B., Lo Vecchio, C., Gatto, I., Baglio, V., Ficca, V.C.A., Patra, A., Placidi, E., D'Epifanio, A.: Metal-organic-framework-derived electrocatalysts for alkaline polymer electrolyte fuel cells. *J Power Sources*. 550, 232135 (2022). <https://doi.org/10.1016/J.JPOWSOUR.2022.232135>
2. Wei, W., Chen, W., Ivey, D.G.: Rock salt-spinel structural transformation in anodically electrodeposited Mn-Co-O nanocrystals. *Chemistry of Materials*. 20, 1941–1947 (2008). <https://doi.org/10.1021/cm703464p>
3. Zhu, J., Gao, Q.: Mesoporous MCo<sub>2</sub>O<sub>4</sub> (M = Cu, Mn and Ni) spinels: Structural replication, characterization and catalytic application in CO oxidation. *Microporous and Mesoporous Materials*. 124, 144–152 (2009). <https://doi.org/10.1016/J.MICROMESO.2009.05.003>
4. Biesinger, M.C., Payne, B.P., Grosvenor, A.P., Lau, L.W.M., Gerson, A.R., Smart, R.S.C.: Resolving surface chemical states in XPS analysis of first row transition metals, oxides and hydroxides: Cr, Mn, Fe, Co and Ni. *Appl Surf Sci*. 257, 2717–2730 (2011). <https://doi.org/10.1016/J.APSUSC.2010.10.051>
5. Ricciardi, B., Mecheri, B., da Silva Freitas, W., Ficca, V.C.A., Placidi, E., Gatto, I., Carbone, A., Capasso, A., D'Epifanio, A.: Porous Iron-Nitrogen-Carbon Electrocatalysts for Anion Exchange Membrane Fuel Cells (AEMFC). *ChemElectroChem*. 10, e202201115 (2023). <https://doi.org/10.1002/CELC.202201115>
6. Ricciardi, B., da Silva Freitas, W., Mecheri, B., Nisa, K.U., Montero, J., Ficca, V.C.A., Placidi, E., Alegre, C., D'Epifanio, A.: Hierarchical porous Fe/Ni-based bifunctional oxygen electrocatalysts for rechargeable zinc-air batteries. *Carbon N Y*. 219, 118781 (2024). <https://doi.org/10.1016/J.CARBON.2023.118781>
7. Bennet, J., Tholkappiyan, R., Vishista, K., Jaya, N.V., Hamed, F.: Attestation in self-propagating combustion approach of spinel AFe<sub>2</sub>O<sub>4</sub> (A = Co, Mg and Mn) complexes bearing mixed oxidation states: Magnetostructural properties. *Appl Surf Sci*. 383, 113–125 (2016). <https://doi.org/10.1016/J.APSUSC.2016.04.177>
8. Marasi, M., Panunzi, A.P., Duranti, L., Lisi, N., Di Bartolomeo, E.: Enhancing Oxygen Reduction Activity and Structural Stability of La<sub>0.6</sub>Sr<sub>0.4</sub>FeO<sub>3-δ</sub> by 1 mol % Pt and Ru B-Site Doping for Application in All-Perovskite IT-SOFCs. *ACS Appl Energy Mater*. 5, 2918–2928 (2022). <https://doi.org/10.1021/acsaem.1c03613>
9. Draz, U., Bartolomeo, E. Di, Panunzi, A.P., Laverdura, U.P., Lisi, N., Chierchia, R., Duranti, L.: Copper-Enhanced CO<sub>2</sub> Electroreduction in SOECs. *ACS Appl Mater Interfaces*. 16, 8842–8852 (2024). <https://doi.org/10.1021/acsaem.1c03613>
10. Zuccante, G., Muhyuddin, M., Ficca, V.C.A., Placidi, E., Acciarri, M., Lamanna, N., Franzetti, A., Zoia, L., Bellini, M., Berretti, E., Lavacchi, A., Santoro, C.: Transforming Cigarette Wastes into Oxygen Reduction Reaction Electrocatalyst: Does Each Component Behave Differently? An Experimental Evaluation. *ChemElectroChem*. 11, e202300725 (2024). <https://doi.org/10.1002/CELC.202300725>

11. Rahimihaghighi, M., Gigli, M., Ficca, V.C.A., Placidi, E., Sgarzi, M., Crestini, C.: Lignin-Derived Sustainable Nano-Platforms: A Multifunctional Solution for an Efficient Dye Removal. *ChemSusChem*. 17, e202400841 (2024). <https://doi.org/10.1002/CSSC.202400841>
12. Jeong, S., Kim, J., Mun, J.: Self-Generated Coating of LiCoO<sub>2</sub> by Washing and Heat Treatment without Coating Precursors. *J Electrochem Soc*. 166, A5038–A5044 (2019). <https://doi.org/10.1149/2.0071903JES/XML>
13. Ji, K., Matras-Postolek, K., Shi, R., Chen, L., Che, Q., Wang, J., Yue, Y., Yang, P.: MoS<sub>2</sub>/CoS<sub>2</sub> heterostructures embedded in N-doped carbon nanosheets towards enhanced hydrogen evolution reaction. *J Alloys Compd*. 891, 161962 (2022). <https://doi.org/10.1016/j.jallcom.2021.161962>
14. Zhang, S., Xiao, X., Lv, T., Lv, X., Liu, B., Wei, W., Liu, J.: Cobalt encapsulated N-doped defect-rich carbon nanotube as pH universal hydrogen evolution electrocatalyst. *Appl Surf Sci*. 446, 10–17 (2018). <https://doi.org/10.1016/j.apsusc.2018.03.033>
15. Tabassum, H., Guo, W., Meng, W., Mahmood, A., Zhao, R., Wang, Q., Zou, R.: Metal–Organic Frameworks Derived Cobalt Phosphide Architecture Encapsulated into B/N Co-Doped Graphene Nanotubes for All pH Value Electrochemical Hydrogen Evolution. *Adv Energy Mater*. 7, (2017). <https://doi.org/10.1002/aenm.201601671>
16. Li, C.-F., Zhao, J.-W., Xie, L., Wu, J.-Q., Li, G.-R.: Water Adsorption and Dissociation Promoted by Co\*/N-C\*-Biactive Sites of Metallic Co/N-Doped Carbon Hybrids for Efficient Hydrogen Evolution. *Appl Catal B*. 282, 119463 (2021). <https://doi.org/10.1016/j.apcatb.2020.119463>
17. Singh, T.I., Rajeshkhanna, G., Pan, U.N., Kshetri, T., Lin, H., Kim, N.H., Lee, J.H.: Alkaline Water Splitting Enhancement by MOF-Derived Fe–Co–Oxide/Co@NC-mNS Heterostructure: Boosting OER and HER through Defect Engineering and In Situ Oxidation. *Small*. 17, (2021). <https://doi.org/10.1002/smll.202101312>
18. Younus, H.A., Al Hinai, M., Al Abri, M., Al-Hajri, R.: Hierarchical Core-Shell Cu@Cu-Ni-Co Alloy Electrocatalyst for Efficient Hydrogen Evolution in Alkaline Media. *Energies (Basel)*. 18, 1515 (2025). <https://doi.org/10.3390/en18061515>
19. Su, Y., Liu, B., Shi, Z., Yan, M., Ma, T.: A Dual-Function Fe-Doped Co<sub>3</sub>O<sub>4</sub> Nanosheet Array for Efficient OER and HER in an Alkaline Medium. *Molecules*. 30, 1046 (2025). <https://doi.org/10.3390/molecules30051046>
20. Mirshokraee, S.A., Muhyuddin, M., Morina, R., Poggini, L., Berretti, E., Bellini, M., Lavacchi, A., Ferrara, C., Santoro, C.: Upcycling of waste lithium-cobalt-oxide from spent batteries into electrocatalysts for hydrogen evolution reaction and oxygen reduction reaction: A strategy to turn the trash into treasure. *J Power Sources*. 557, 232571 (2023). <https://doi.org/10.1016/j.jpowsour.2022.232571>
21. Yan, X., Tian, L., He, M., Chen, X.: Three-Dimensional Crystalline/Amorphous Co/Co<sub>3</sub>O<sub>4</sub> Core/Shell Nanosheets as Efficient Electrocatalysts for the Hydrogen Evolution Reaction. *Nano Lett*. 15, 6015–6021 (2015). <https://doi.org/10.1021/acs.nanolett.5b02205>

22. Liu, T., Cai, S., Zhao, G., Gao, Z., Liu, S., Li, H., Chen, L., Li, M., Yang, X., Guo, H.: Recycling valuable cobalt from spent lithium ion batteries for controllably designing a novel sea-urchin-like cobalt nitride-graphene hybrid catalyst: Towards efficient overall water splitting. *Journal of Energy Chemistry*. 62, 440–450 (2021). <https://doi.org/10.1016/j.jechem.2021.03.052>
